# Supplementary material
Source: Springer Nature journal article supplement (https://www.springerprofessional.de/resource/supplementary/13638_2014_942_MOESM4_ESM.pdf/11898802)
Supplement: MOESM4 [file 11898802]

# Sensing Stage

$\Psi_{k_0}^{l_0}$ : Set of vacant channels

$S \setminus \Psi_{k_0}^{l_0}$ : Set of busy

or "spectrum holes";  $j_3 \in \Psi_{k_0}^{l_0}$

channels;  $j_4 \in S \setminus \Psi_{k_0}^{l_0}$

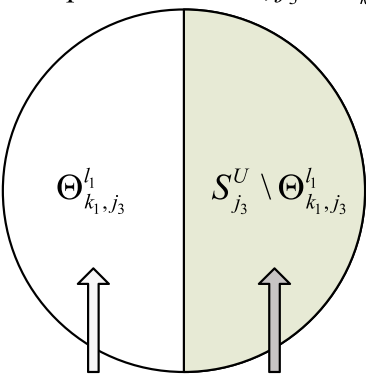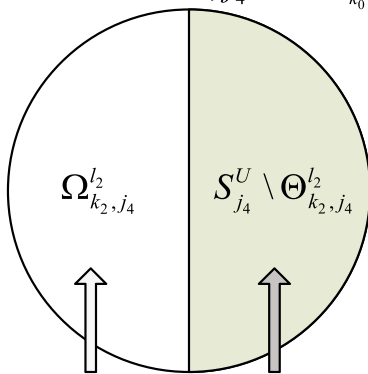

SUs detect a "spectrum hole"

a)

SUs mis-detect a "spectrum hole"

SUs mis-detect a busy channel

b)

SUs detect a busy channel

# Reporting Stage

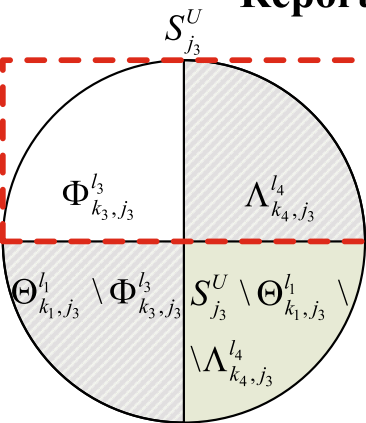

c)

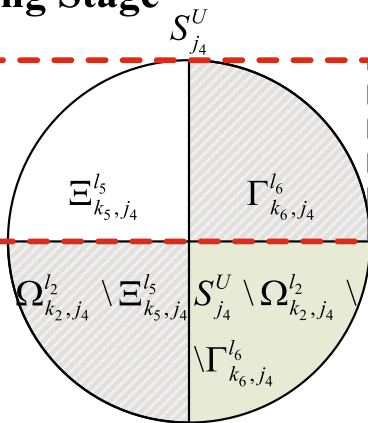

d)

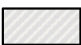

Set of SUs from whom SU  $i_4/i_9$  collects wrong information (reporting errors)

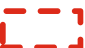

Set of SUs from whom SU  $i_4/i_9$  collects information that channel  $j_3 / j_4$  is vacant
